# Supplementary material for: Fabrication and properties of PLA/nano-HA composite scaffolds with balanced mechanical properties and biological functions for bone tissue engineering application
Source: publisher site journal article supplement (doi:10.1515/ntrev-2021-0083), 2021-01-01
Supplement: Supplementary file 1 [file ntrev-2021-0083_sm.pdf]

## Supplementary Material

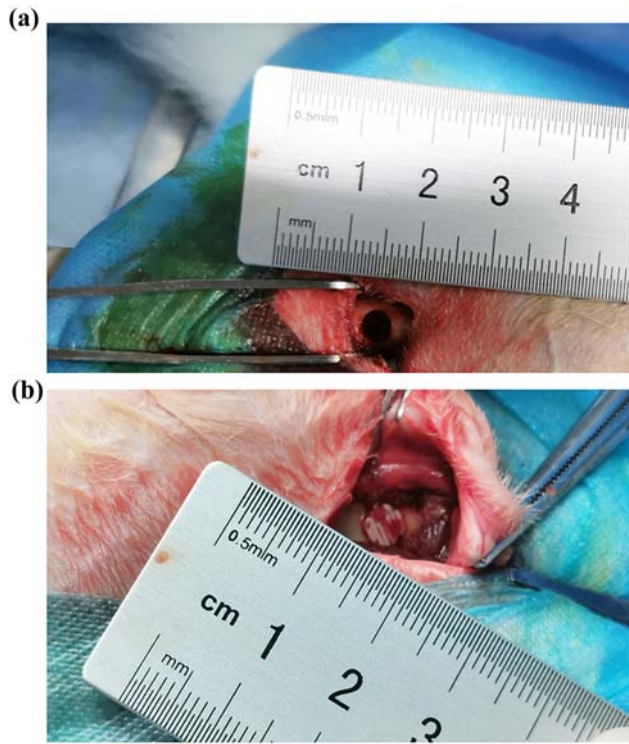

**Figure S1:** The implantation of a 3D printed scaffold in rabbit femur. (a) The bone trephine with a diameter of 5 mm was used to drill into the femur of the rabbit, and the bone fragment was removed and (b) the drilling position of the rabbit femur was implanted with the 3D printed scaffold.
